# Supplementary material for: The impact of self-monitoring in chronic illness on healthcare utilisation: a systematic review of reviews
Source: PubMed Central journal article supplement (PMC4683734; doi:10.1186/s12913-015-1221-5), 2015-12-18
Supplement: 12913_2015_1221_MOESM1_ESM.pdf [file 12913_2015_1221_MOESM1_ESM.pdf]

## Electronic Supplementary Material 1

### **1. Cochrane Library (Title, abstract or keywords)**

self care  
self monitor\*  
self administer\*  
self examin\*  
self medicat\*  
self inject\*  
self evaluat\*  
self test\*  
self manage\*  
self adjust\*  
self measure\*  
patient participation  
patient monitor\*  
patient manage\*  
patient adjust\*  
patient administer\*  
patient control\*  
patient cent?d  
telemedicine  
telehealth  
telecare  
telemonitor\*  
telemetry  
home monitor\*

### **2. DARE & HTA**

self care  
self monitor\*  
self administer\*  
self examin\*  
self medicat\*  
self inject\*  
self evaluat\*  
self test\*  
self manage\*  
self adjust\*  
self measure\*  
patient participation  
Monitoring, Physiologic[Mesh]  
patient manage\*  
patient adjust\*  
patient administ\*  
patient control\*  
patient centered

patient centred  
telemedicine  
telehealth  
telecare  
telemonitor\*  
home monitor\*

### **3. Pub med**

self care[Mesh]  
self monitor\*  
self administration[Mesh]  
self examination[Mesh]  
self medication[Mesh]  
self inject\*  
self test\*  
self management[Mesh]  
self adjust\*  
self evaluat\*  
self measure\*  
patient-centered care[Mesh]  
patient participation[Mesh]  
Monitoring, Physiologic[Mesh]  
patient manage\*  
patient adjust\*  
patient administ\*  
patient control\*  
telemedicine[Mesh]  
telecare  
telehealth  
telemonitor\*  
home monitor\*

### **AND**

Meta-Analysis[Publication Type][Mesh]  
Review[Publication Type][Mesh]  
overview  
narrative review

### **5, 6, 7 & 8. AMED, HMIC, EMBASE & PsycINFO**

Self Care/  
self monitor\$.mp.  
self administer\$.mp.  
self examin\$.mp.  
self medicat\$.mp.  
self inject\$.af  
self evaluat\$.mp.

self test\$.af.  
self management.mp.  
self adjust\$.mp.  
self measure\$.mp  
Patient participation/  
Patient monitor\$.mp.  
Patient manage\$.mp.  
Patient adjust\$.mp.  
Patient administer\$.mp.  
Patient control\$.mp.  
Patient centred.mp.  
Telemedicine/  
Telehealth.mp.  
Telecare.mp.  
telemonitoring.ab. or telemonitoring.ti.  
telemetry.mp.  
home monitor\*

#### **4. CINAHL plus**

MH Self Care+  
self monitor\*  
MH Self Administration+  
self examine\*  
MH Self Medication  
self inject\*  
self evaluat\*  
self test\*  
self manage\*  
self adjust\*  
self measure\*  
MH Health Services+  
MH Monitoring, Physiologic+  
patient manage\*  
patient adjust\*  
patient administer\*  
patient control\*  
MH Telehealth+  
telecare  
telemonitor\*  
home monitor\*
