# Supplementary material for: The impact of self-monitoring in chronic illness on healthcare utilisation: a systematic review of reviews
Source: PubMed Central journal article supplement (PMC4683734; doi:10.1186/s12913-015-1221-5), 2015-12-18
Supplement: 12913_2015_1221_MOESM4_ESM.pdf [file 12913_2015_1221_MOESM4_ESM.pdf]

Electronic Supplementary Material 4

**Table** Review characteristics

| First author year   | Type of review | Aim                                                                                                                        | Period searched        | Inclusion/Exclusion criteria                                                                                                                                           | n primary research studies(n participants) | Primary outcome/s | Quality assessment tool | AMSTAR score |
|---------------------|----------------|----------------------------------------------------------------------------------------------------------------------------|------------------------|------------------------------------------------------------------------------------------------------------------------------------------------------------------------|--------------------------------------------|-------------------|-------------------------|--------------|
| <u>Hypertension</u> |                |                                                                                                                            |                        |                                                                                                                                                                        |                                            |                   |                         |              |
| Jaana 2007          | SR             | Evaluate the evidence for the effectiveness of hypertension telemonitoring.                                                | 1966 to 2006           | <u>Design:</u> Experimental or quasi-experimental<br><u>Participants:</u> Chronic hypertension<br><u>Intervention:</u> Home telemonitoring                             | 14(1119)                                   | BP                | None                    | 4            |
| AbuDagga 2010       | SR & MA        | What is the impact of BP telemonitoring technologies on clinical, patient-centred outcomes, healthcare utilization & cost? | 1995 to September 2009 | <u>Design:</u> RCT, single group, quasi-experimental<br><u>Participants:</u> Established diagnosis of uncontrolled hypertension<br><u>Intervention:</u> Telemonitoring | 15(3192)                                   | BP                | None                    | 4            |
| <u>COPD</u>         |                |                                                                                                                            |                        |                                                                                                                                                                        |                                            |                   |                         |              |

| First author year    | Type of review | Aim                                                                                                                                                                                             | Period searched           | Inclusion/Exclusion criteria                                                                              | n primary research studies(n participants) | Primary outcome/s                       | Quality assessment tool | AMSTAR score |
|----------------------|----------------|-------------------------------------------------------------------------------------------------------------------------------------------------------------------------------------------------|---------------------------|-----------------------------------------------------------------------------------------------------------|--------------------------------------------|-----------------------------------------|-------------------------|--------------|
| Turnock 2005         | SR & MA        | Determine whether action plans alone, or as part of a broader self-management intervention, are an effective way to manage COPD exacerbations.                                                  | Not stated                | <u>Design:</u> RCT<br><u>Participants:</u> Diagnosed primary COPD<br><u>Intervention:</u> Action planning | 3(367)                                     | Hospital admissions                     | Jadad scale & Cochrane  | 4            |
| McLean 2012          | SR & MA        | To review the effectiveness of telehealthcare for COPD compared with face-to-face usual care in improving quality of life & reducing accident & emergency department visits & hospitalisations. | Inception to January 2010 | <u>Design:</u> RCT<br><u>Participants:</u> Diagnosed COPD<br><u>Intervention:</u> Telehealthcare          | 10(1307)                                   | Quality of life, healthcare utilisation | Cochrane risk of bias   | 5            |
| <i>Heart failure</i> |                |                                                                                                                                                                                                 |                           |                                                                                                           |                                            |                                         |                         |              |

| First author year | Type of review | Aim                                                                                                                                                   | Period searched  | Inclusion/Exclusion criteria                                                                                      | n primary research studies(n participants) | Primary outcome/s                  | Quality assessment tool      | AMSTAR score |
|-------------------|----------------|-------------------------------------------------------------------------------------------------------------------------------------------------------|------------------|-------------------------------------------------------------------------------------------------------------------|--------------------------------------------|------------------------------------|------------------------------|--------------|
| Louis 2003        | SR             | To present the current evidence on telemonitoring as a means of reducing hospitalisations in heart failure.                                           | 1996 to 2002     | <u>Design:</u> NR<br><u>Participants:</u> Diagnosed HF<br><u>Intervention:</u> Telemonitoring                     | 24(3643)                                   | Acceptability, hospital admissions | None                         | 4            |
| Jovicic 2006      | SR & MA        | Determine the effectiveness of self-management interventions on hospital readmission rates, mortality & QoL in patients diagnosed with heart failure. | 1966 to Nov 2005 | <u>Design:</u> RCT<br><u>Participants:</u> Hospitalised with diagnosed HF<br><u>Intervention:</u> Self-management | 6(857)                                     | Readmissions, mortality            | Author designed              | 7            |
| Martinez 2006     | SR             | To assess the value of home monitoring for heart failure patients.                                                                                    | 1966 to Apr-04   | <u>Design:</u> Experimental studies<br><u>Participants:</u> Not stated<br><u>Intervention:</u> Home monitoring    | 42(2303)                                   | Patient acceptability              | Jovell & Navarro-Rubio scale | 6            |

| First author year | Type of review | Aim                                                                                                                               | Period searched      | Inclusion/Exclusion criteria                                                                                          | n primary research studies(n participants) | Primary outcome/s          | Quality assessment tool                                                  | AMSTAR score |
|-------------------|----------------|-----------------------------------------------------------------------------------------------------------------------------------|----------------------|-----------------------------------------------------------------------------------------------------------------------|--------------------------------------------|----------------------------|--------------------------------------------------------------------------|--------------|
| Chaudhry 2007     | SR             | In-depth examination of a wide range of telemonitoring interventions in heart failure to find out which components are effective. | 1966 to Aug-06       | <u>Design:</u> Randomized study design<br><u>Participants:</u> Adults with HF<br><u>Intervention:</u> Home monitoring | 9(3582)                                    | Hospitalization, mortality | Juni et al & York Centre for Reviews & Dissemination                     | 5            |
| Clark 2007        | SR & MA        | To determine whether remote monitoring without regular clinic or home visits improves outcomes for patients with CHF.             | Jan 2002 to May 2006 | <u>Design:</u> RCT<br><u>Participants:</u> HF, living at home<br><u>Intervention:</u> Remote monitoring               | 14(4264)                                   | Hospitalization, mortality | Cochrane                                                                 | 8            |
| Dang 2009         | SR             | Examine the evidence base for home telehealth & remote monitoring interventions in the management of heart failure.               | 1966 to Apr-09       | <u>Design:</u> RCT<br><u>Participants:</u> HF<br><u>Intervention:</u> Home telehealth & remote monitoring             | 9(2017)                                    | Hospitalization, mortality | Adapted Hailey et al which was adapted from Jovell & Navarro-Rubio scale | 5            |

| First author year | Type of review | Aim                                                                                                                                                           | Period searched          | Inclusion/Exclusion criteria                                                                                                                   | n primary research studies(n participants) | Primary outcome/s          | Quality assessment tool | AMSTAR score |
|-------------------|----------------|---------------------------------------------------------------------------------------------------------------------------------------------------------------|--------------------------|------------------------------------------------------------------------------------------------------------------------------------------------|--------------------------------------------|----------------------------|-------------------------|--------------|
| Klersy 2009       | SR & MA        | Assess the effect of remote patient monitoring on the outcome of CHF patients.                                                                                | Jan 2000 to October 2008 | <u>Design:</u> RCT, observational cohort studies<br><u>Participants:</u> CHF, living at home<br><u>Intervention:</u> Remote patient monitoring | 32(8612)                                   | Hospitalization, mortality | CONSORT & STROBE        | 6            |
| Maric 2009        | SR             | Review studies conducted in heart failure telemonitoring, which are not telephone based, but utilize the concept of patient self-monitoring in heart failure. | Inception to August 2007 | <u>Design:</u> Any<br><u>Participants:</u> HF<br><u>Intervention:</u> Use of technology or device to assist in self-monitoring                 | 56(NR)                                     | Hospitalization            | None                    | 2            |

| First author year | Type of review | Aim                                                                                                                                                                | Period searched                   | Inclusion/Exclusion criteria                                                                                                                | n primary research studies(n participants) | Primary outcome/s          | Quality assessment tool                      | AMSTAR score |
|-------------------|----------------|--------------------------------------------------------------------------------------------------------------------------------------------------------------------|-----------------------------------|---------------------------------------------------------------------------------------------------------------------------------------------|--------------------------------------------|----------------------------|----------------------------------------------|--------------|
| Polisena 2010     | SR & MA        | Conduct a SR & MA to look at clinical outcomes, patient QoL & the use of healthcare services for home telemonitoring compared to usual care for patients with CHF. | 1998 to 2008                      | <u>Design:</u> RCT, observational studies<br><u>Participants:</u> CHF<br><u>Intervention:</u> Home telemonitoring                           | 22(3028)                                   | Hospitalization, mortality | Adapted version Jovell & Navarro-Rubio scale | 5            |
| Inglis 2010       | SR & MA        | To review RCTs of structured telephone support or telemonitoring compared to standard practice for patients with CHF.                                              | From 2006 onwards                 | <u>Design:</u> RCT<br><u>Participants:</u> CHF, within the community<br><u>Intervention:</u> Structured telephone support or telemonitoring | 30(10490)                                  | Hospitalization, mortality | Author designed                              | 9            |
| Clarke 2011       | MA             | To assess the effectiveness of telemonitoring on primary & secondary outcomes.                                                                                     | From January 1969 to October 2009 | <u>Design:</u> RCT<br><u>Participants:</u> CHF<br><u>Intervention:</u> Telemonitoring                                                       | 13(NR)                                     | Hospitalization, mortality | None                                         | 5            |

| First author year | Type of review | Aim                                                                                                                                                                | Period searched                                           | Inclusion/Exclusion criteria                                                                                                                                         | n primary research studies(n participants) | Primary outcome/s                 | Quality assessment tool                                        | AMSTAR score |
|-------------------|----------------|--------------------------------------------------------------------------------------------------------------------------------------------------------------------|-----------------------------------------------------------|----------------------------------------------------------------------------------------------------------------------------------------------------------------------|--------------------------------------------|-----------------------------------|----------------------------------------------------------------|--------------|
| Giamouzis 2012    | SR             | To assess whether telemonitoring provides any substantial benefit in patients with heart failure.                                                                  | Inception to November 2011                                | <u>Design:</u> RCT<br><u>Participants:</u> CHF<br><u>Intervention:</u> Telemonitoring                                                                                | 12(3877)                                   | Mortality, healthcare utilisation | None                                                           | 3            |
| Pandor 2013       | SR & MA        | To determine whether RM strategies improve outcomes for adults who have been recently discharged (<28 days) following an unplanned admission due to heart failure. | 2008 to January 2012 (plus papers from 2 earlier reviews) | <u>Design:</u> RCT, observational cohort studies<br><u>Participants:</u> Adults, HF, discharged from hospital with <28days<br><u>Intervention:</u> Remote monitoring | 21(6317)                                   | All-cause mortality               | Criteria based on The Delphi list & The Newcastle-Ottawa Scale | 6            |

AMSTAR – Assessing the Methodological Quality of Systematic Reviews; BP – Blood Pressure; CHF - Chronic Heart Failure; CONSORT - Consolidated Standards of Reporting Trials; COPD - Chronic Obstructive Pulmonary Disease; HF- Heart Failure; MA – Meta-Analysis; NR – Not Reported; QoL – Quality of Life; RCT – Randomised Controlled Trial; SR – Systematic Review; STROBE - Strengthening the Reporting of Observational studies in Epidemiology; RM – remote monitoring
