# Supplementary material for: The impact of self-monitoring in chronic illness on healthcare utilisation: a systematic review of reviews
Source: PubMed Central journal article supplement (PMC4683734; doi:10.1186/s12913-015-1221-5), 2015-12-18
Supplement: 12913_2015_1221_MOESM5_ESM.pdf [file 12913_2015_1221_MOESM5_ESM.pdf]

Electronic Supplementary Material 5

**Table.** Intervention characteristics

| <b>First author, year</b> | <b>Type of intervention</b> | <b>Level of patient involvement</b>                                                                                                                                                                                                                                                                                                                                                                         | <b>Recommended frequency of monitoring</b> | <b>Behaviour/s monitored</b>                                                       | <b>Follow-up time</b>                  |
|---------------------------|-----------------------------|-------------------------------------------------------------------------------------------------------------------------------------------------------------------------------------------------------------------------------------------------------------------------------------------------------------------------------------------------------------------------------------------------------------|--------------------------------------------|------------------------------------------------------------------------------------|----------------------------------------|
| <u>Hypertension</u>       |                             |                                                                                                                                                                                                                                                                                                                                                                                                             |                                            |                                                                                    |                                        |
| Jaana, 2007               | BP telemonitoring           | Data was given to a HCP. No information on what these readings were used for.                                                                                                                                                                                                                                                                                                                               | Range 6 a day to weekly                    | BP, heart rate, symptoms, medication adherence, stress, ECG, weight, sleep quality | Study duration range 5 days-12 months  |
| AbuDagga, 2010            | Telemonitoring              | Self-measurement & self-transmission of BP. Typically, when BP values exceeded predetermined parameters, an alarm message was automatically generated & sent to a nurse or pharmacist, who contacted patients with disease management tips &/or contacted primary care providers for action. In other cases, the alarm message was sent directly to patients with instructions to contact their physicians. | Range once a week to a few times a day     | BP (in some studies titration decisions, side effects)                             | Study duration range 8 weeks-24 months |
| <u>COPD</u>               |                             |                                                                                                                                                                                                                                                                                                                                                                                                             |                                            |                                                                                    |                                        |

| <b>First author, year</b> | <b>Type of intervention</b> | <b>Level of patient involvement</b>                                                                                                                                                             | <b>Recommended frequency of monitoring</b>              | <b>Behaviour/s monitored</b>                                                                        | <b>Follow-up time</b>             |
|---------------------------|-----------------------------|-------------------------------------------------------------------------------------------------------------------------------------------------------------------------------------------------|---------------------------------------------------------|-----------------------------------------------------------------------------------------------------|-----------------------------------|
| Turnock, 2005             | Action planning             | All studies included patients using an action plan to interpret symptoms & make adjustments to their medications or seeking HCP advice.                                                         | NR                                                      | Symptoms                                                                                            | 6 months & 1 year                 |
| McLean, 2012              | Telehealthcare              | In all studies patients were required to transmit data to HCP for personalised feedback. In some studies patients were trained to make changes to their medication according to an action plan. | NR                                                      | NR                                                                                                  | 3, 6 & 12 months                  |
| <u>Heart failure</u>      |                             |                                                                                                                                                                                                 |                                                         |                                                                                                     |                                   |
| Louis, 2003               | Telemonitoring              | NR                                                                                                                                                                                              | NR                                                      | Weight, BP, HR, ECG, respiratory rate, body temperature, extracellular fluid, weight, O2 saturation | Range post intervention-12 months |
| Jovicic, 2006             | Self-management             | Patients were taught to recognise when to seek medical assistance.                                                                                                                              | NR                                                      | Sign, symptoms, weight                                                                              | Range 3 months-1 year             |
| Martinez-Everss, 2006     | Home monitoring             | Data was given to a HCP. There is no information on what these readings were used for.                                                                                                          | NR                                                      | ECG, weight, BP, symptoms                                                                           | Range 3-12 months                 |
| Chaudhry, 2007            | Telemonitoring              | Data was given to a HCP & was used by a nurse or clinician to adjust medication.                                                                                                                | Range twice daily to being determined by patient status | Symptoms, weight, physiologic measures                                                              | Range 60 days-12 months           |

| <b>First author, year</b> | <b>Type of intervention</b>                    | <b>Level of patient involvement</b>                                                                                                                     | <b>Recommended frequency of monitoring</b>        | <b>Behaviour/s monitored</b>                                                                                                                          | <b>Follow-up time</b>                                                                            |
|---------------------------|------------------------------------------------|---------------------------------------------------------------------------------------------------------------------------------------------------------|---------------------------------------------------|-------------------------------------------------------------------------------------------------------------------------------------------------------|--------------------------------------------------------------------------------------------------|
| Clark, 2007               | Telemonitoring or structured telephone support | Data was given to a HCP. There is no information on what these readings were used for.                                                                  | Range daily to being determined by patient status | Symptoms, weight, pulse, BP, electrocardiographic data                                                                                                | Range 2 months-400 days                                                                          |
| Dang, 2009                | Home telehealth remote monitoring              | Data was given to a HCP. There is no information on what these readings were used for.                                                                  | Range twice daily to weekly                       | Weight, BP, HR, O2 saturation, symptoms, ECG, pulse, steps/day, medication, pedal oedema, respiratory effort, facial expressions, ankle circumference | Range 3-12 months                                                                                |
| Klersy, 2009              | Remote monitoring                              | NR                                                                                                                                                      | NR                                                | Symptoms, weight, BP, physical activity, HR, ECG, arrhythmias, O2 saturation, RV pressure                                                             | RCT: Median 6 months (range 2-18 months)<br>Cohort studies: Median 12 months (range 2-17 months) |
| Maric, 2009               | Telemonitoring                                 | Authors report that changes in weight & symptoms were interpreted & appropriate action taken. However, they fail to report what happened in each trial. | NR                                                | Signs, symptoms, weight, medication, BP, CAD risk factors, HR, O2 saturation, QoL, blood test results, pulse, ECG, steps per day                      | Range 3 months-1 year                                                                            |

| <b>First author, year</b> | <b>Type of intervention</b>         | <b>Level of patient involvement</b>                                                                                                                                          | <b>Recommended frequency of monitoring</b> | <b>Behaviour/s monitored</b>                                                                                                                                     | <b>Follow-up time</b> |
|---------------------------|-------------------------------------|------------------------------------------------------------------------------------------------------------------------------------------------------------------------------|--------------------------------------------|------------------------------------------------------------------------------------------------------------------------------------------------------------------|-----------------------|
| Polinsena, 2010           | Telemonitoring                      | Authors discuss patients being encouraged to assume a more active role in their disease management; however, they fail to report what happened in each trial.                | NR                                         | NR                                                                                                                                                               | Ranged 30 days-1 year |
| Inglis, 2010              | Telephone support or telemonitoring | It is unclear what happened to the data in a majority of studies. In many, data were sent to a HCP for review; however, it is unclear what happened as a result.             | Range twice daily to weekly                | Symptoms, adherence, BP, HR, weight, 24hr urine output                                                                                                           | Range 3-18 months     |
| Clarke, 2011              | Telemonitoring                      | It is unclear what the data was used for in each trial. 10 studies included physiological monitoring & data were transmitted to HCP to determine if any action was required. | Daily                                      | Weight, heart rate. BP, ECG, HF symptoms                                                                                                                         | NR                    |
| Giamouzis, 2012           | Telemonitoring                      | NR                                                                                                                                                                           | NR                                         | Weight, BP, heart rate, medication dose, dyspnoea, asthenia or oedema score, blood results, changes in therapy, pulse oximetry, symptoms, 24hr urine output, ECG | Range 6-26 months     |

| <b>First author, year</b> | <b>Type of intervention</b> | <b>Level of patient involvement</b> | <b>Recommended frequency of monitoring</b>         | <b>Behaviour/s monitored</b>                                                                                                                             | <b>Follow-up time</b>            |
|---------------------------|-----------------------------|-------------------------------------|----------------------------------------------------|----------------------------------------------------------------------------------------------------------------------------------------------------------|----------------------------------|
| Pandor, 2013              | Remote monitoring           | NR                                  | Ranged daily to being determined by patient status | Signs & symptoms, current medication, weight, BP, HR, ECG, fluid retention, dyspnoea, ankle circumference, 24hr urine output, o <sup>2</sup> saturation. | Study duration range 3-15 months |

BP – Blood Pressure; CAD – Coronary Artery Disease; ECG – electrocardiogram; HCP – healthcare professional; HR – heart rate; HF – heart failure; NR – not reported; RV – right ventricle
